# Supplementary material for: The Structural and Functional Organization of the Podocyte Filtration Slits Is Regulated by Tjp1/ZO-1
Source: PubMed Central journal article supplement (PMC4153657; doi:10.1371/journal.pone.0106621), 2014-09-03

# Figure S1

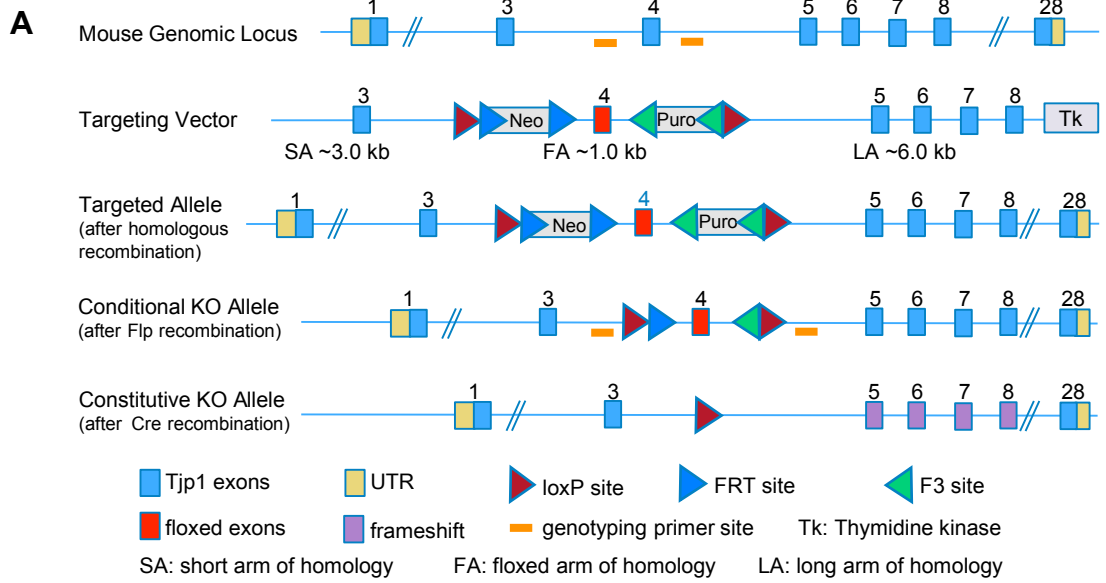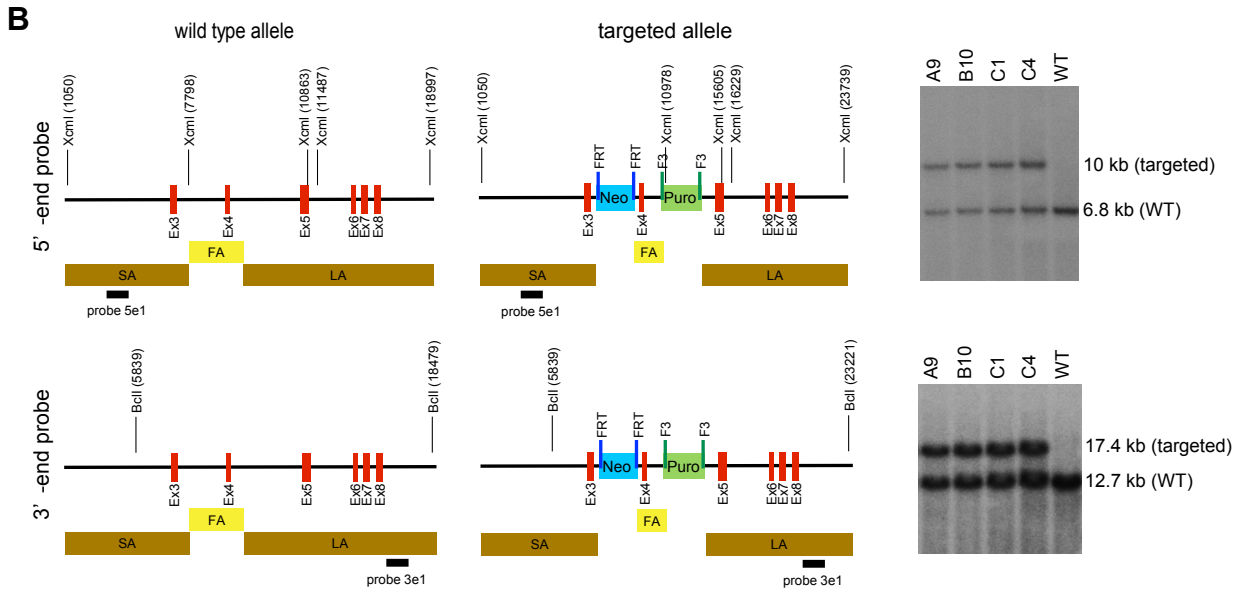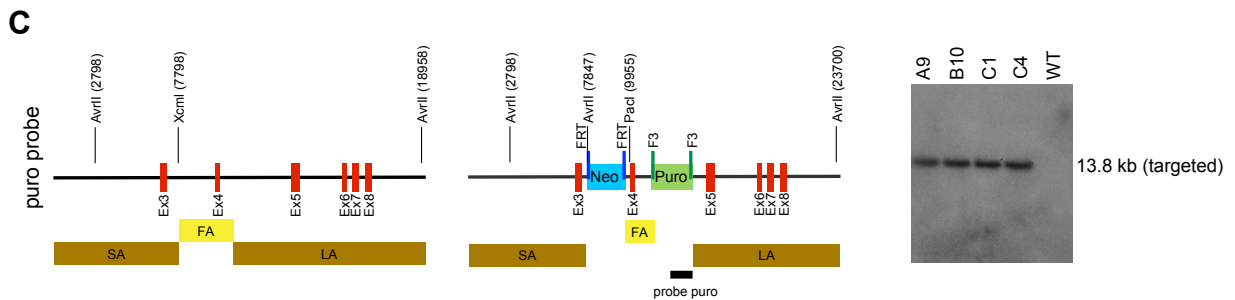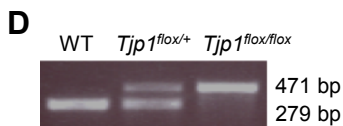

Supplement: pone.0106621.s001.pdf [file pone.0106621.s001.pdf]
